# Supplementary material for: Feed-forward recruitment of electrical synapses enhances synchronous spiking in the mouse cerebellar cortex
Source: eLife. 2020 Sep 29;9:e57344. doi: 10.7554/eLife.57344 (PMC7524550; doi:10.7554/eLife.57344)
Supplement: Figure 1—figure supplement 1—source data 1. [file elife-57344-fig1-figsupp1-data1.xlsx]

## Sheet: Panel B
Figure 1 - figure supplement 1 The amplitude of direct EPSCs and outward currents are not correlated.
	Figure 1 - figure supplement 1B
	BL		10V		20V		30V		40V
	Inward current peak (pA)	Outward current peak (pA)	Inward current peak (pA)	Outward current peak (pA)	Inward current peak (pA)	Outward current peak (pA)	Inward current peak (pA)	Outward current peak (pA)	Inward current peak (pA)	Outward current peak (pA)
	0.127773	-1.31651	-0.426045	-1.12938	-119.358	-0.9238	-604.816	1.9163	-616.603	4.2581
	-1.85685	1.22785	-2.52516	1.6798	-303.352	-0.0519	-522.994	11.1607	-520.2	9.4538
	0.885449	0.895931	-1.15314	-1.72568	-81.1872	0.87439	-436.828	-4.3724	-505.606	11.3819
	-0.684675	1.02338	2.39118	2.65192	2.29389	5.10106	-528.4	8.8622	-576.669	7.6354
	0.294614	0.2454	-3.54893	-0.619777	-77.2073	0.265826	-508.774	9.1993	-491.453	7.4787
	-1.65966	0.018	-4.01409	-0.444504	-167.979	-4.57511	-363.069	-3.9201	-580.828	11.716
	-1.47768	1.16872	-76.385	-2.56364	-321.422	2.02566	-403.443	8.0833	-518.893	8.3055
	2.85556	1.11454	-3.60573	3.81456	-254.494	1.12857	-502.415	7.9323	-468.73	10.8292
	1.89638	0.87137	-81.1584	-0.96921	-259.258	1.15627	-607.566	10.4916	-514.434	2.2904
	-0.476694	1.01051	-0.91874	2.31322	-290.492	-2.78894	-301.595	-4.9717	-581.449	7.7153
	-0.945307	0.813	-1.86087	3.61	-98.5293	12.5565	-414.759	7.1937	-548.37	9.2436
	-0.159593	-0.784619	-6.95262	0.614897	-168.316	0.123	-400.598	10.166	-499.494	6.9662
	0.456654	-1.09504	-2.01615	-1.2572	-146.492	-5.12873	-403.081	10.7585	-667.756	6.7416
	1.93945	-0.306785	-4.35737	1.49197	-103.503	0.0661	-352.68	12.9321	-496.086	6.9635
	0.174779	-0.92228	-1.27545	0.476096	-178.736	-8.15597	-493.84	5.6976	-571.893	10.2371
	0.89705	-2.55538	-2.88998	-1.51509	-163.827	-6.19626	-571.914	5.7895	-475.482	10.981
	-0.197518	-1.07792	1.16286	-1.30682	-174.244	-1.87	-420.167	12.4307	-592.714	12.5625
	-0.775638	-0.853347	0.0621	-0.0386	-138.1	1.502	-405.199	9.7452	-672.234	8.5887
	-1.42277	0.117	0.195886	1.9	-145.604	2.23384	-457.815	11.6485	-495.737	10.4229
	Summary Statistics
	BL		10V		20V		30V		40V
	Inward current peak (pA)	Outward current peak (pA)	Inward current peak (pA)	Outward current peak (pA)	Inward current peak (pA)	Outward current peak (pA)	Inward current peak (pA)	Outward current peak (pA)	Inward current peak (pA)	Outward current peak (pA)
N traces	19		19		19		19		19
Mean	-0.00677242	-0.0213949	-9.96188	0.367506	-167.885	-0.139875	-457.89	6.881	-547.09	8.62
SD	1.29331	1.08999	24.3564	1.89419	85.2557	4.48707	85.735	5.669	61.064	2.598
	Statistical Test Performed
	Linear least squares regression analysis
		20V		30V		40V
	Equation	Y = 0,01294*X + 0,002033		Y = -0,01409*X + 0,0004309		Y = 0,005934*X + 0,01187
	Is slope significantly non-zero? - F test
	F	1.094		0.8082		0.3373
	DFn, DFd	1, 17		1, 17		1, 17
	P value	0.3102		0.3812		0.569

## Sheet: Panel C
			Figure 1 - figure supplement 1C
Cell	Linear regression P value per stimulation		Histogram bin centers	Number of values
c1	0.0754		0	0
	0.9742		0.1	2
c2	0.1743		0.2	3
	0.6132		0.3	3
	0.8804		0.4	3
c3	0.3952		0.5	3
	0.4783		0.6	4
c4	0.269		0.7	5
	0.7914		0.8	1
	0.6664		0.9	2
	0.6925		1	1
c5	0.2715
	0.4224
	0.6519
	0.2415
c6	0.1349
	0.4741
c7	0.926
	0.7126
	0.5642
c8	0.4603
	0.6179
	0.1846
	0.7404
c9	0.3102
	0.3812
	0.569
