# Supplementary material for: Feed-forward recruitment of electrical synapses enhances synchronous spiking in the mouse cerebellar cortex
Source: eLife. 2020 Sep 29;9:e57344. doi: 10.7554/eLife.57344 (PMC7524550; doi:10.7554/eLife.57344)
Supplement: Figure 1—source data 1. [file elife-57344-fig1-data1.xlsx]

## Sheet: Panel D
Figure 1. PF-induced inhibitory current mediated by electrical synapses in cerebellar basket cells.
Figure 1D
Data
Cell	Distance from soma	OC amplitude (pA)	Oc amplitude (only significant)
c1	149.918	14.62	14.62
	92.2312	5.645	5.645
	60.1569	3.44	3.44
	32.299	0
c2	159.467	5.629	5.629
	106.579	6.054	6.054
	55.3656	0
	13.668	2.262	2.262
c3	129.116	15.22	15.22
	85.3751	15.84	15.84
	55.9143	16.15	16.15
	17.224	0
c4	164.688	0
	118.161	9.735	9.735
	59.7026	15.17	15.17
	22.3606	8.679	8.679
c5	178.443	0
	141.428	5.35	5.35
	63.2016	4.854	4.854
	24.0353	6.964	6.964
c6	119.693	4.189	4.189
	89.095	11.59	11.59
	42.8918	8.313	8.313
	21.6048	0
c7	145.523	0
	91.2247	5.836	5.836
	30.6224	0
	0	5.736	5.736
c8	125.406	8.597	8.597
	74.8467	11.68	11.68
	37.0183	6.124	6.124
	0	0
c9	147.723	15.12	15.12
	79.9003	19.04	19.04
	26.854	5.511	5.511
	0	7.969	7.969
c10	157.007	6.038	6.038
	117.628	5.039	5.039
	54.5519	14.09	14.09
	12.085	6.133	6.133
c11	185.199	8.92	8.92
	111.714	10.35	10.35
	49.4241	5.021	5.021
	0	0
c12	168.828	12.61	12.61
	126.692	7.465	7.465
	53.9143	6.878	6.878
	0	0
c13	163.335	9.323	9.323
	115.434	11.64	11.64
	59.8263	4.424	4.424
	34.5722	0
N stim. sites	52	52	40
N cells	13
Statistical test performed
Test			F-test P value
Simple linear least squares regression analysis			0.1653

## Sheet: Panel E
Figure 1E - fractional block by NBQX
Cell	Baseline	Control	NBQX
2015-04-14-c4	-0.09	11.49	1.37
2015-04-16-c1	-0.49	5.44	-0.6
2015-04-16-c2	0.69	7.36	0.86
2015-04-27-c2	-0.66	9.48	0.4
2015-04-27-c4	-0.2	12.02	1.41
Mean	-0.15	9.158	0.688
SD	0.5214	2.774	0.8303
SEM	0.2332	1.241	0.3713

## Sheet: Panel G
	Figure 1G
	EPSC amplitude (pA) per group
	K+-IS	Cs+-IS	Mefloquine	DMSO only
	-58.51	-92.14	-50.38	-124.4
	-172.36	-85.63	-83.4	-221.77
	-117.83	-159	-100.96	-369.39
	-45.46	-58.44	-101.66	-269.41
	-99.24	-147.61	-41.49	-46.3
	-203.77	-117.56	-41.19	-29.9
	-52.71	-228.24	-88.28	-115.8
	-91.74	-88.17	-119.86	-275.38
	-88.05	-208.26	-72.12	-206.61
	-269.54	-309.12	-356.36	-237.18
	-34.44	-189.3	-155.96	-323.98
	-105.03	-183.6	-281.83	-172.3
	-65.89	-337.5	-110.11	-68.15
	-264.12	-388.6	-119.83	-64.07
	-80.66	-182	-104.97	-74.38
	-309.1	-112.5	-328.06	-148.19
	-52.8	-452.2	-229.19	-31.45
	-49.93	-464.8	-296.15	-96.8
	-61.19	-82.03	-276.53	-48.26
	-168.43	-87.49	-145.1	-40.21
	-34.9	-269.6	-122.42	-58.81
	-55.7	-376.07	-204.71	-86.76
	-91.8	-75.33	-120.42	-89.1
	-98.55	-309.01	-291.16	-44.17
	-161.76	-102.82	-76.09	-103.4
	-155.32	-440.51	-109.86	-143.3
	-104.54	-65.83	-396.55	-81.5
	-169.81	-91.78	-406.59	-54.1
	-175.77	-413.63	-205.2	-112.9
	-292.97	-74.98	-86.18	-72.2
	-473.57	-121.02	-316.16	-476
	-139.97	-107.05	-381.88	-316
	-392.8	-161.93	-280.18	-280
	-267.09	-49.66	-191.43	-650.3
	-56.59	-65.78	-124.98	-487.8
	-201.6	-379.76	-86.28	-105
	-256.2	-173.42	-34.02
	-71.58		-80.97
	-81.37		-42.68
	-199.09		-99.73
	-428.31		-49.75
	-30.66		-95
	-82.15		-315.86
	-111.26		-500.01
	-216.28		-50.53
	-64.66		-506.4
	-94.9		-94.82
	-123.44		-172.27
	-608.76		-71.7
	-57.93		-195.33
	-33.87		-450.06
	-106.86		-541.88
	-397.37		-98.36
	-104.54		-179.8
	-170.34		-274.47
	-335.25		-406.7
	-173.64		-227.23
	-260.95		-202.45
	-271.79		-265.33
	-549.43		-282.72
	-65.13		-63.02
	-90.17		-120.58
	-175.53		-153.2
	-163.56		-435.26
	-99.98
	-239.27
	-246.68
	-146.21
	-53.77
	-102.35
	-162.95
	-207.55
	-173.12
	-125.71
	-57.92
	-87.94
	-71.28
	-68.18
	-155.25
	-250.48
	-120.29
	-203.77
	-239.32
	-330.87
	-66.13
	-91.76
	-83.54
	-428.32
	-45.84
	-55.11
	-112.76
	-149.9
	-58.77
	-88.94
	-90.37
	-81.37
	Summary Statistics per group
	K+-IS	Cs+-IS	Mefloquine	DMSO only
N stim. Sites	96	37	64	36
N cells	26	10	16	11
Avg	-157.1	-196	-195.5	-170.1
SD	117.2	130.7	134.1	147.8
SEM	11.96	21.49	16.76	24.63
Statistical Test of 4 groups
Test				P value
Kruskal-Wallis Test				0.1224

## Sheet: Panel H
Figure 1H
Group	Frequency (%)	N (stimulation sites)	SD	SEM
K+-IS	59.62	104	49.07	4.811
Cs+-IS	64.86	37	47.74	7.848
Mefloquine	14.93	67	35.63	4.353
DMSO only	61.1	36	48.7	8.117
Statistical Test Performed
Bown-Forsyhe and Welch ANOVA test, with Dunnett's multiple comparisons test			Multiplicity adjusted P value
Groups compared	K+ - IS vs. Cs+-- IS		0.911
	K+ - IS vs. Mefloquine		<0,0001
	K+ - IS vs. DMSO only		0.9977

## Sheet: Panel I
	Figure 1I
	Peak outward current (pA) per group
	K+-IS	Cs+-IS	Mefloquine	DMSO only
	4.1	6	3.2	10.4
	3.3	3.9	4	16.6
	2.4	9.4	1.6	6.4
	14.6	4.9	1.2	9
	5.6	7.6	3.3	4.2
	3.4	3.6	3.4	2.5
	5.6	8.4	1.7	5.4
	6.1	4	2.5	5.9
	2.2	4.3	3.3	4.6
	15.2	10.8	4.6	4.3
	15.8	6.1		5.2
	16.1	11.5		6.3
	4.2	6.8		7.6
	8.7	27.1		10.3
	5.3	27.9		8.7
	4.9	24		17.05
	7	9		12.9
	4.2	6.9		8.9
	11.6	8.7		7.8
	8.3	19.5		2.6
	5.8	6.1		6.6
	5.7			7.7
	8.6
	11.7
	10.4
	15.1
	19
	9.3
	6
	5
	14.1
	6.1
	5.3
	10.3
	3.9
	8.9
	10.3
	5
	12.6
	7.5
	6.9
	9.3
	11.6
	4.4
	12.7
	13.2
	11.6
	13.1
	12.7
	13.2
	7.1
	13.8
	6.5
	6.8
	10.2
	4.8
	10.2
	6.3
	Summary Statistics per group
	K+-IS	Cs+-IS	Mefloquine	DMSO only
N stim. sites	58	24	10	22
N cells	20	10	8	10
Avg	8.683	9.758	2.88	7.77
SD	4.068	7.262	1.102	3.891
SEM	0.5342	1.482	0.3486	0.8295
Lower 95% CI of mean	7.613	6.692	2.091	6.045
Upper 95% CI of mean	9.753	12.82	3.669	9.495
Statistical Test
Kruskal-Wallis test with Dunn's multiple comparisons test to control				Multiplicity adjusted P value
Groups compared	K+ - IS vs. Cs+ - IS			>0,9999
	K+ - IS vs. Mefloquine			<0,0001
	K+ - IS vs. DMSO only			>0,9999
