# Supplementary material for: Feed-forward recruitment of electrical synapses enhances synchronous spiking in the mouse cerebellar cortex
Source: eLife. 2020 Sep 29;9:e57344. doi: 10.7554/eLife.57344 (PMC7524550; doi:10.7554/eLife.57344)
Supplement: Figure 2—source data 1. [file elife-57344-fig2-data1.xlsx]

## Sheet: Panel B
Figure 2: Outward currents are reduced in Cx36 KO BCs and WT SCs
	Figure 2B
	Frequency of observations (%)
	P90-P150 BCs (WT)	P90-P150 BCs (Cx36-/-)	P90-P150 SCs (WT)
Mean	78.9474	44.6429	14.8148
SD	40.7683	49.7122	35.5247
SEM	6.61348	6.64307	6.83673
N stim. Sites	38	56	27
N cells	11	14	8
Statistical Test Performed
Brown-Forsythe and Welch test with Dunnett's multiple comparisons test			Multiplicity adjusted P value
P90-P150 BCs (WT) vs. P90-P150 BCs (Cx36-/-)			0.0009
P90-P150 BCs (WT) vs. P90-P150 SCs (WT)			<0,0001

## Sheet: Panel C
	Figure 2C
	Outward current peak amplitude (pA)
	P90-P150 BCs (WT)	P90-P150 BCs (Cx36-/-)	P90-P150 SCs (WT)
	7.5	1.4	2.1
	11.7	2.3	3.2
	8.2	2.3	1.5
	12.4	1.8	2
	8.1	7
	8.8	2
	13.1	2.8
	10.8	1.9
	24.1	1.1
	7.9	9.2
	2.8	1
	32.3	1
	37	1.4
	29.7	7.5
	26.8	5
	34.6	4.9
	6.4	4.6
	7.1	2
	7.1	13.8
	3.6	11.4
	5.7	5.2
	6.1	3.5
	3.1
	3
	6.1
	5.7
	10.5
	13.2
	14.2
	12.3
Summary Statistics
N stim. Sites	30	22	4
N cells	10	8	2
Mean	12.66	4.232	2.2
SD	9.906	3.56	0.7165
SEM	1.809	0.759	0.3582
Lower 95% CI of mean	8.964	2.653	1.06
Upper 95% CI of mean	16.36	5.81	3.34
Statistical Test Performed
Kruskal-Wallis test with Dunn's multiple comparisons test			Multiplicity adjusted P value
P90-P150 BCs (WT) vs. P90-P150 BCs (Cx36-/-)			<0,0001
P90-P150 BCs (WT) vs. P90-P150 SCs (WT)			0.0047
