# Supplementary material for: Feed-forward recruitment of electrical synapses enhances synchronous spiking in the mouse cerebellar cortex
Source: eLife. 2020 Sep 29;9:e57344. doi: 10.7554/eLife.57344 (PMC7524550; doi:10.7554/eLife.57344)
Supplement: Figure 3—figure supplement 1—source data 1. [file elife-57344-fig3-figsupp1-data1.xlsx]

## Sheet: Panel E
Figure 3 - figure supplement 1. Evidence for subthreshold EPSCs crossing electrical synapses in off-beam stimulations.
	Figure 2 - figure supplement 1E
Stimulation intensity (V)	10		20		30		40
Inward and outward currents peak amplitude (pA)	-0.645382	0.605164	-7.15555	3.10702	-11.2546	4.3987	-15.0442	4.81066
	-0.0198019	0.435554	-6.59832	-0.347099	-6.07349	3.11129	-13.5353	4.29582
	0.0189763	-0.130688	-3.74541	0.393335	-5.62044	1.80997	-12.2932	5.37572
	-0.776333	0.894572	-3.64561	-1.76059	-7.83087	-2.2809	-12.0846	4.42271
	-0.182918	0.0240066	-9.61919	-0.947446	-7.844	2.88003	-10.4549	4.9737
	-0.908446	-1.08717	-4.83268	-0.314792	-7.20001	1.91294	-11.7394	4.19338
	1.54656	1.64965	-4.2318	-0.21563	-9.66205	2.65511	-12.0857	4.34106
	-1.49306	-1.77299	-7.94269	-1.19192	-12.7846	3.36015	-10.9876	4.5499
	0.618929	-0.323201	-4.30086	-2.34999	-8.53156	1.66037	-11.8515	4.11589
	-0.74532	2.22462	-3.92941	-1.55144	-9.89734	6.0722	-10.7885	7.40726
	-0.0549971	0.604994	-3.4476	0.679969	-9.81406	1.85163	-12.6434	3.74384
	-1.19097	0.507072	-3.85516	1.90348	-8.41135	2.25496	-11.736	5.36119
	-0.171453	-1.40617	-8.37604	0.307858	-9.77291	1.50026	-12.0642	4.82807
	0.182318	-0.493623	-4.63257	1.32809	-6.19856	3.04994	-13.0438	2.23507
	0.633778	-0.796273	-4.05678	-0.967346	-9.70531	5.15927	-11.6126	3.54703
	-0.741352	-0.641892	-6.3578	0.0239276	-7.60766	0.470976	-11.0859	5.64111
	1.00837	1.69	-3.32169	-0.264065	-7.75573	-1.51376	-12.4449	4.34336
	-0.0182278	-0.324865	-1.62072	0.390094	-8.76741	1.62811	-12.8822	3.52479
	-0.537451	-0.045972	-7.34013	-2.19731	-7.49154	0.598504	-10.7076	4.5465
	-0.469352	-0.150659	-4.56221	-1.51208	-7.64003	0.426516	-13.4478	1.98431
	1.20752	-0.54755	-3.57324	-0.780905	-14.0314	2.89265	-11.6454	5.84386
	-0.184415	0.226848	-7.56881	-2.75501	-4.63201	1.94317	-10.8803	4.5744
	0.779041	-1.4725	-4.96831	-0.574392	-7.88454	1.47664	-11.2457	3.70891
	1.16073	1.56173	-7.0604	1.4659	-9.45187	5.27181	-13.5768	6.34686
	1.01283	-0.493599	-7.84225	0.401858	-6.2571	3.04116	-12.2441	3.35613
	0.180582	1.38367	-5.16319	-2.4627	-6.4878	2.53662	-11.6759	5.4744
	0.873971	-0.851406			-8.51215	-0.220137	-8.91054	5.96332
	0.790798	-0.131743
	-1.74228	-1.94815
	-0.46771	1.28982
Mean	-0.0111688	0.015975	-5.37494	-0.391969	-8.41187	2.14623	-11.9523	4.57442
SD	0.841683	1.07737	1.98071	1.42196	2.10304	1.89428	1.21026	1.17706
N	30	30	26	26	27	27	27	27
SEM	0.156297	0.200062	0.396142	0.284392	0.412441	0.371499	0.237352	0.230841
2*SD of baseline
Inward current	1.7
Outward current	2.14
