# Supplementary material for: Feed-forward recruitment of electrical synapses enhances synchronous spiking in the mouse cerebellar cortex
Source: eLife. 2020 Sep 29;9:e57344. doi: 10.7554/eLife.57344 (PMC7524550; doi:10.7554/eLife.57344)
Supplement: Figure 3—source data 1. [file elife-57344-fig3-data1.xlsx]

## Sheet: Panel E
Figure 3. In the absence of PF-EPSCs GABAergic-independent outward currents are preceded by a short-lasting inward current
	Figure 3E
Stimulation intensity (V)	20		30		40		50
Inward and outward currents peak amplitude (pA)	-0.0462695	3.2292	-13.6734	2.84957	-20.8142	17.8324	-26.5108	11.3706
	3.53948	1.84176	-11.1697	-8.26115	-14.3224	6.49955	-22.0366	21.5877
	4.93607	5.48331	-18.2259	17.5128	-20.6077	14.933	-23.4266	16.5726
	-3.78105	-2.52554	-12.1366	2.25115	-17.5331	5.00201	-24.8758	14.9482
	-2.30967	3.38198	-3.53632	2.73066	-11.4422	8.08507	-30.6179	15.3196
	-3.26486	-2.12233	-4.76661	-5.34781	-28.4954	15.256	-30.6573	7.86558
	-0.997811	1.50273	-7.58561	-0.161603	-12.2449	2.40406	-32.1291	11.4264
	-4.7548	-3.33774	-6.9947	0.0607606	-13.5531	4.19025	-28.8544	10.5847
	2.21723	1.74822	-6.02802	-3.89128	-25.7355	13.5802	-12.1179	7.14863
	1.6435	2.73311	-16.3097	5.55226	-22.0613	17.8908	-30.0866	16.0574
	-1.64601	-0.244896	-10.0361	-3.98422	-21.6055	22.0984	-27.15	18.3963
	1.58839	1.51683	-6.12773	1.85326	-23.3902	12.094	-26.2926	13.6888
	-1.92306	-0.629871	-6.87582	-2.29082	-19.1695	17.7512	-26.4585	18.4347
	-0.71729	0.318418	-13.1841	7.53265	-16.23	10.045	-19.5756	1.40097
	0.0795595	0.445013	-11.8781	9.29611	-22.4335	18.0453	-31.262	15.112
	0.313475	2.49555	-27.4754	19.5587	-25.0024	20.9419	-27.7357	12.0098
			-10.107	-5.37226	-10.1917	8.48926	-26.0605	13.4553
					-28.0605	15.5539	-30.9047	14.9923
					-20.8886	18.7196
					-24.4673	15.2924
Mean	-0.320195	0.989734	-10.9477	2.3464	-19.9124	13.2352	-26.4863	13.354
SD	2.66227	2.36281	5.89102	7.72865	5.45458	5.82132	4.94317	4.71313
N	16	16	17	17	20	20	18	18
SEM	0.687395	0.610076	1.47275	1.93216	1.25137	1.3355	1.19889	1.1431
2*SD of baseline
Inward current	2,67
Outward current	2.77

## Sheet: Panel J
	Figure 3J
Stimulation intensity (V)	20		30		40		50
Inward and outward currents peak amplitude (pA)	0.977292	2.00274	-3.3622	3.56906	-6.6098	5.02426	-17.3083	11.0358
	-0.967047	1.26409	-1.50797	2.81593	-2.40808	1.6859	-16.2552	12.7422
	-2.62021	1.05101	-1.25902	5.55981	-5.74201	2.88482	-17.6506	11.0408
	-0.434893	-0.0641857	-4.34997	-0.847307	-8.70902	4.75221	-16.4957	12.4672
	-3.45607	-4.04329	-2.45164	1.63444	-5.06262	5.06069	-19.0597	15.4203
	-1.11459	1.18963	-4.16422	0.961505	-6.98309	1.9719	-17.1883	10.3328
	1.10273	3.5478	-1.08117	6.74226	-4.68227	1.41799	-16.2646	11.3131
	0.145324	-0.910312	-0.946362	3.07199	-6.90939	2.706	-18.6302	9.00429
	0.843454	1.82702	-5.54359	1.12966	-6.96965	5.85202	-19.3645	10.4488
	-0.553728	-1.00521	-3.2082	4.55994	-2.63761	7.82718	-17.4906	13.082
	-0.637509	-0.895309	-5.15919	4.99282	-3.55521	1.82565	-17.7812	10.3505
	-1.61148	-0.963656	-5.03439	5.49908	-2.96515	3.34763	-19.8492	12.0386
	1.61301	1.31962	-3.7423	1.72715	-5.4769	2.22356	-21.4965	15.8849
	-2.51908	-2.59299	-5.1435	-0.994886	-4.83629	2.86068	-14.1308	12.5413
	-3.06827	-1.81897	-2.37887	3.98405	-3.87341	5.0766	-18.843	19.6108
	-3.93734	-0.27486	-3.63056	2.08206	-3.49344	4.35742	-18.336	11.5457
	-2.66747	0.424482	-4.43212	3.14295	-5.77598	5.34257	-15.7087	11.5948
	0.740406	0.733908	-4.36529	3.14241	-4.59102	6.69881	-18.2217	7.3706
	-0.910952	-2.02234	-1.60666	5.19653	-6.02742	3.98235	-14.5115	12.7902
	-0.927539	-1.21588	-0.934381	4.01436	-3.54236	6.0275	-14.1976	10.7468
	2.06275	2.9413	-1.44307	5.27155	-4.14852	1.65875	-18.8602	9.27
	-0.205198	2.20202	-0.972231	6.30489	-6.20662	7.48955	-14.1029	7.35707
	-3.74718	-3.54742	-5.13067	1.53958	-4.26949	0.625823	-17.1111	9.72565
	-0.571619	0.601534	-4.96392	1.66172	-4.94508	3.74395	-14.6532	12.11
	1.7758	0.845015	-1.53869	3.59794	-4.48005	1.33953	-17.9447	12.9052
	0.45297	1.3077	-7.0011	1.42865			-17.063	13.4092
	0.853502	-1.09749
Mean	-0.717887	0.0298502	-3.28274	3.1457	-4.99602	3.83133	-17.2507	11.7746
SD	1.74803	1.88274	1.77911	2.05383	1.55079	2.03549	1.90617	2.57548
N	27	27	26	26	25	25	26	26
SEM	0.342817	0.369235	0.355822	0.410767	0.316554	0.415493	0.381234	0.515096
2*SD of baseline
Inward current	2.45
Outward current	2.09
