# Supplementary material for: Feed-forward recruitment of electrical synapses enhances synchronous spiking in the mouse cerebellar cortex
Source: eLife. 2020 Sep 29;9:e57344. doi: 10.7554/eLife.57344 (PMC7524550; doi:10.7554/eLife.57344)
Supplement: Figure 4—figure supplement 1—source data 1. [file elife-57344-fig4-figsupp1-data1.xlsx]

## Sheet: Panel A
	Figure 4 - figure supplement 1 : Relationship between coupling coefficients and spikelet transmission, and distance-independence of coupling coefficients
	Figure 4 - figure supplement 1A
	CC threshold (%)	Fraction of pairs exhibiting a CC above threshold (%)
	0	100
	2	59.7015
	4	49.2537
	6	34.3284
	8	25.3731
	10	22.3881
	12	14.9254
	14	8.95522
	16	8.95522
	18	7.46269
	20	5.97015
	22	2.98507
	24	0
	26	0

## Sheet: Panel C
Figure 4 - figure supplement 1C
Intersomatic distance (µm)	Coupling coefficient (%)
	All pairs	Strongly coupled pairs (CC>2.3%)
20	14.3167	14.3167
46	3.6671	3.6671
52	5.6864	5.6864
39	6.9386	6.9386
41	7.1998	7.1998
30	1.1162
27	0
52	1.6158
26	8.7639	8.7639
20	5.6436	5.6436
22	14.0903	14.0903
34	14.0366	14.0366
31	0
48	0
46	11.0206	11.0206
24	4.7245	4.7245
17	0.9599
18	6.8136	6.8136
26	3.7485	3.7485
37	3.3632	3.3632
39	0
51	0
46	0
32	5.1282	5.1282
39	5.2057	5.2057
24	11.1132	11.1132
13	23.0035	23.0035
57	6.1145	6.1145
35	0.2951
50	12.9231	12.9231
59	0
62	3.7792	3.7792
44	0
63	6.0537	6.0537
43	9.8898	9.8898
40	24.6865	24.6865
41	0
61	0
36	6.444	6.444
60	21.7959	21.7959
58	1.9008
57	0
40	10.8509	10.8509
43	2.2775
49	11.2882	11.2882
41.4082	1.9044
23.1366	7.8551	7.8551
32.1943	19.7702	19.7702
53.1759	2.4706	2.4706
21.8098	8.8011	8.8011
35.2598	0
19.3166	18.1106	18.1106
32.5846	0
51.4676	3.6624	3.6624
17.3438	6.2295	6.2295
36.4956	3.6512	3.6512
16.7541	11.575	11.575
17.5605	0
21.7838	7.0524	7.0524
18.2977	22.4924	22.4924
39.379	13.591	13.591
25.6687	0
39.8473	0
30.5684	2.1185
26.1457	0
32.216	7.2248	7.2248
54.8062	0
Summary Statistics
N pairs	67	41
Mean	6.164	9.775
SD	6.552	5.999
SEM	0.800454	0.936886
Lower 95% CI of mean	0.04565	0.07882
Upper 95% CI of mean	0.07762	0.1167
Statistical Test Performed
Linear least squares regression analysis
Equation	Y = -0.1210*X +10.65	Y = -0.09649*X + 13.1
Is slope significantly non-zero? - F test
F	4.388	2.09
DFn, DFd	1, 65	1.39
P value	0.0401	0.1563
