# Supplementary material for: Feed-forward recruitment of electrical synapses enhances synchronous spiking in the mouse cerebellar cortex
Source: eLife. 2020 Sep 29;9:e57344. doi: 10.7554/eLife.57344 (PMC7524550; doi:10.7554/eLife.57344)
Supplement: Figure 4—source data 1. [file elife-57344-fig4-data1.xlsx]

## Sheet: Panel C
Figure 4. Properties of electrical connectivity between BCs
	Figure 4C
	Coupling Coefficient (%) per group
	Control	Gabazine
	12.0883	10.6373
	13.9281	18.4482
	4.3847	3.8331
	5.368	6.8998
	7.4646	7.3915
	9.4694	6.9459
	24.7749	23.9765
	28.1297	21.965
	25.458	19.5469
	23.9149	20.767
	21.6349	20.8541
	21.9569	14.8393
	14.2122	11.9874
	8.3642	10.5682
	8.5943	9.7305
	9.5068	7.3802
	Summary Statistics per group
	Control	Gabazine
N cells	16
N pairs	8
Avg	14.95	13.49
SD	8.031	6.528
SEM	2.008	1.632
Lower 95% CI of mean	10.67	10.01
Upper 95% CI of mean	19.23	16.96
Statistical Test Performed
Test		P value
Wilcoxon matched-pairs signed rank test		0.0833

## Sheet: Panel E
Figure 4E
Coupling coefficient (%)	HJC peak amplitude (pA)	DJC peak amplitude (pA)
10.9847	-3.56	0.15
11.2416	-4.33	0
11.4064	-15.16	1.91
14.4397	-8.21	2.08
4.447	-1.93	1.27
7.6604	-1.58	0.77
9.5522	-10.63	1.55
10.2274	-11.8	0.84
20.767	-22.48	3.07
19.5469	-22.9	1.69
14.8393	-21.86	2.05
20.8541	-16.58	2.39
11.9874	-4.94	0.72
18.278	-19.81	2.69
21.2624	-20.48	3.18
2.7937	-0.38	0.43
2.1475	-0.57	0.09
7.8533	-1.85	0.76
9.7489	-1.99	0.42
15.1173	-12.34	2.34
21.1038	-14.85	2.04
11.6148	-7.25	1.63
11.5352	-3.33	1.51
18.8499	-15.14	2.03
26.1349	-15.13	2.69
13.8895	-10.9	0.67
13.2924	-9.26	0.62
Summary Statistics
N cells	27
N pairs	14
Mean	-10.34	1.466
SD	7.403	0.9412
SEM	1.425	0.1811
Lower 95% CI of mean	-13.27	1.094
Upper 95% CI of mean	-7.414	1.839
Statistical Test Performed
Linear least squares regression analysis
Equation	Y = -0.8097*X + 0.000	Y = 0.1113*X + 0.000
Is slope significantly non-zero? - F test
F	187.3	196.6
DFn, DFd	1, 26	1, 26
P value	<0,0001	<0,0001

## Sheet: Panel F
Figure 4F
Coupling coefficient (%)	HJP peak amplitude (mV)	DJP peak amplitude (mV)
10.6373	-0.48707	0.16241
18.4482	-0.236	0.33933
6.8998	-0.12413	0.03212
3.8331	-0.04557	0.16116
6.9459	-0.19685	0.19382
7.3915	-0.18502	0.30307
23.9765	-0.53707	1.47321
21.965	-0.34859	1.00751
11.4064	-0.17176	0.68716
14.4397	-0.33895	0.5371
4.447	-0.05897	0.14661
7.6604	-0.02433	0.20915
10.2274	-0.14137	0.51232
9.5522	-0.11195	0.48146
20.767	-0.24848	1.22039
19.5469	-0.23279	1.03361
14.8393	-0.3394	0.72784
20.8541	-0.31679	0.57467
10.5682	-0.09079	0.32254
11.9874	-0.10696	0.36437
Summary Statistics
N cells	20
N pairs	10
Mean	-0.2171	0.5245
SD	0.1419	0.3944
SEM	0.03173	0.0882
Lower 95% CI of mean	-0.2835	0.3399
Upper 95% CI of mean	-0.1507	0.7091
Statistical Test Performed
Linear least squares regression analysis
Equation	Y = -0.01676*X + 0.000	Y = 0.04328*X + 0.000
Is slope significantly non-zero? - F test
F	107.8	151.5
DFn, DFd	1, 19	1, 19
P value	<0,0001	<0,0001
