# Supplementary material for: Feed-forward recruitment of electrical synapses enhances synchronous spiking in the mouse cerebellar cortex
Source: eLife. 2020 Sep 29;9:e57344. doi: 10.7554/eLife.57344 (PMC7524550; doi:10.7554/eLife.57344)
Supplement: Figure 5—source data 1. [file elife-57344-fig5-data1.xlsx]

## Sheet: Panel B
	Figure 5B						Figure 5B						Figure 5B
	Inward Peak current amplitude (pA) per Postsynaptic Vm						Outward Peak current amplitude (pA) per Postsynaptic Vm						Charge Transfer (pC) per Postsynaptic Vm
	-90 mV	-80 mV	-70 mV	-60 mV			-90 mV	-80 mV	-70 mV	-60 mV			-90 mV	-80 mV	-70 mV	-60 mV
	-5.79	-6.42	-6.4	-6.28			0.28	0.85	1.27	1.33			-0.01004	0.00592	0.02374	0.02574
	-4.42	-5.1	-5.05	-5.14			0.62	0.86	0.84	1.13			0.00074	-0.00543	0.00684	0.0185
	-19.07	-16.74	-16.62	-18.27			2.26	1.86	2.3	3.78			-0.00484	-0.00891	0.00526	0.025
	-24.64	-26.35	-21.69	-26.95			2.28	2.18	3.01	3.78			0.0335	0.00542	0.03983	0.03993
	-17	-21.27	-22.89	-21.39			4.61	3.17	3.42	2.96			0.04619	0.01728	0.01808	-0.00479
	-19.12	-22.36	-22.41	-23.94			2.11	1.57	1.84	1.5			0.01205	-0.00155	-0.01115	0.00019
	-7.62	-7.06	-7.37	-8.21			2.15	2.59	2.59	2.52			0.00737	-0.00093	0.00481	-0.00482
	-15.2	-16.86	-15.48	-15.2			1.39	1.76	2.23	2.46			0.00648	0.01098	0.0283	0.02469
	-15.16	-15.96	-16.02	-14.85			2.2	1.57	1.71	1.31			0.00175	0.00933	0.0035	0.01014
	-10.05	-12.18	-12.69	-12.51			1.12	1.06	1.33	1.96			-0.00648	-0.01113	-0.01096	0.00504
	-8.2	-8.61	-3.36	-4.29			1.41	1.75	1.49	1.78			0.01025	0.01147	0.0107	0.02551
	-8.87	-7.86	-7.31	-7.65			1.59	2.41	1.4	1.53			0.0075	0.0275	0.01243	0.02277
N spikelets	12
N pairs	6
	Statistical Test						Statistical Test						Statistical Test
	Test			p value			Test			p value			Test			p value
	Friedman test			0.4493			Friedman test			0.3916			Friedman test			0.0821

## Sheet: Panel D
	Figure 5D					Figure 5D					Figure 5D
	Inward Peak current amplitude (pA) per Presynaptic Vm					Outward Peak current amplitude (pA) per Presynaptic Vm					Charge Transfer (pC) per Presynaptic Vm
	-80 mV	-70 mV	-60 mV			-80 mV	-70 mV	-60 mV			-80 mV	-70 mV	-60 mV
	-5.45	-5.05	-4.25			0.34	1.27	1.88			-0.02244	0.02374	0.04994
	-6.57	-6.4	-5.92			0.02	0.84	1.66			-0.03261	0.00684	0.02732
	-28.26	-21.69	-20.04			0.18	2.3	6.94			-0.10179	0.00526	0.12892
	-26.8	-16.62	-15.06			0.89	3.01	9.29			-0.06062	0.03983	0.12426
	-25.33	-22.41	-17.1			0.24	3.42	8.05			-0.05736	0.01808	0.06924
	-27.07	-22.89	-18.21			0.57	1.84	5			-0.08575	-0.01115	0.05804
	-23.41	-21.58	-16.06			0.2	2.68	4.61			-0.05254	0.01224	0.02764
	-19.42	-19.94	-11.92			0.35	3.18	7.81			-0.0593	0.02191	0.12482
	-15.47	-16.02	-13.77			0.54	1.57	3.56			-0.03443	0.0035	0.06036
	-10.67	-12.69	-8.12			0.57	1.33	4.45			-0.04521	-0.01096	0.04597
	-7.46	-3.36	-3.79			0.52	1.49	4.33			-0.02384	0.0107	0.09314
	-10.24	-7.31	-7.02			0.13	1.4	3.46			-0.02276	0.01243	0.0524
N spikelets	12
N pairs	6
	Statistical Test					Statistical Test					Statistical Test
	Test		p value			Test		p value			Test		p value
	Friedman test		0.0002			Friedman test		< 0.0001			Friedman test		< 0.0001

## Sheet: Panel E
	Figure 5E
	-80mV		-70mV		-60mV		Direct stimulation		OFF-beam stimulation
	IC peak amplitude (pA)	OC peak amplitude (pA)	IC peak amplitude (pA)	OC peak amplitude (pA)	IC peak amplitude (pA)	OC peak amplitude (pA)	IC peak amplitude (pA)	OC peak amplitude (pA)	IC peak amplitude (pA)	OC peak amplitude (pA)
	-5.45	0.34	-5.05	1.04	-4.25	1.57	-7.11	3.99	-32.66	9.96
	-6.57	0.02	-6.4	0.83	-5.92	1.58	-17.28	6.16	-16.5	7.13
	-28.26	0.18	-21.69	2.25	-20.04	6.44	-11.25	5.87	-19.16	11.28
	-26.8	0.89	-16.62	3.06	-15.06	7.09	-6.1	4.33	-35.56	10.34
	-25.33	0.24	-22.41	2.31	-17.1	4.39	-3.26	2.16	-17.38	13.24
	-27.07	0.57	-22.89	1.83	-18.21	4.75	-7.87	4.93	-24.91	4.58
	-23.41	0.35	-21.58	2.37	-16.06	5.53	-4.59	4.37	-15.59	5.94
	-19.42	0.02	-19.94	1.88	-11.92	1.96	-17.19	11.46	-16.2	6.8
	-15.47	0.57	-16.02	1.15	-13.77	2.74	-7.72	8.22	-4.2	2.8
	-10.67	0.54	-12.69	0.92	-8.12	2.88	-14.57	11.15	-9.7	2.7
	-7.46	0.13	-3.36	1.31	-3.79	2.72	-22.35	14.79	-8.37	3.17
	-10.24	0.52	-7.31	1.4	-7.02	3.74	-30.71	17.6	-35.07	16.16
									-35.27	8.49
									-23.37	8.266
N stim. Sites	NA		NA		NA		12		14
N cells	12		12		12		10		11
N pairs	6		6		6		NA		NA
Are the slopes of the -60mV, -70mV and -80mV groups significantly different?
F	10.79
DFn, DFd	2, 30
P value	0.0003
Are the slopes of the -60 mV group and the Direct stimulation group significantly different?						Are the slopes of the -60 mV group and the indirect stimulation group significantly different?
F	7.441					F	0.0083
DFn, DFd	1, 20					DFn, DFd	1, 22
P value	0.013					P value	0.9282

## Sheet: Panel F
	Figure 5F
	Normalised charge trasfer (ms) per group
	-60 mV (Pair)	Direct stim	Off-beam stim
	7.00739	16.84	7.41994
	10.6635	6.559	7.65649
	7.68613	16.7515	7.99589
	7.23901	19.7155	7.56658
	3.65342	21.779	11.8339
	3.94674	16.548	4.99202
	2.44507	23.9002	27.878
	8.24375	19.197	10.3883
	3.39514	19.0018	16.656
	7.48776	17.448	4.478
	13.134	17.8494	5.65203
	13.1552	15.0947	11.5148
			5.45079
			10.6219
	Summary Statistics per group
	-60 mV (Pair)	Direct stim	Off-beam stim
N stim. Sites	NA	12	14
N cells	12	10	11
N pairs	6	NA	NA
Avg	7.338	17.56	10.01
SD	3.62	4.23	6.123
SEM	1.045	1.221	1.636
Lower 95% CI of mean	5.038	14.87	6.472
Upper 95% CI of mean	9.638	20.24	13.54
Statistical Test Performed			P value
Kruskal-Wallis test, with Dunn's multiple comparisons			0.0003
Groups compared	Direct stim. vs -60 mV (Pair)		0.0003
	off-beam stim. vs -60 mV (Pair)		0.95
	Direct stim. vs off-beam stim.		0.008
