# Supplementary material for: Feed-forward recruitment of electrical synapses enhances synchronous spiking in the mouse cerebellar cortex
Source: eLife. 2020 Sep 29;9:e57344. doi: 10.7554/eLife.57344 (PMC7524550; doi:10.7554/eLife.57344)
Supplement: Figure 6—figure supplement 1—source data 1. [file elife-57344-fig6-figsupp1-data1.xlsx]

## Sheet: PanelB
		Figure 6 - figure supplement 1: Identification of GABAergic connections in BC paired recordings
		Control	+ Gabazine
			Connections in which gabazine did NOT show a detectable blockade	Connections in which gabazine did show a detectable blockade		Average fractional block
		Outward current peak amplitude (pA)
	2017-03-29-p2-Left	5.7		1.3		0.77193
	2017-10-02-p1-Right	5.8		3.7		0.362069
	2017-10-02-p1-Left	5.2		3.4		0.346154
	2017-10-04-p2-Right	1.4	1.1
	2017-10-04-p2-Left	1.8	1.2
	2017-10-18-p2-Right	1.2	1.3
	2017-11-13-p3-Right	4.15		2.5		0.39759
	2017-11-13-p3-Left	8.35		6.7		0.197605
	2017-11-15-p2-Right	1.3	0.6
	2017-11-15-p2-Left	2.23	1.2
	2017-11-16-p3-Right	0.5	1.5
	2017-11-16-p3-Left	3.9		1.4		0.641026
	2017-12-05-p2-Right	1.6	0.5
	2017-12-05-p2-Left	2		0.6		0.7
	2018-02-13-p3-Right	5.7		2.6		0.54386
	2018-02-13-p3-Left	5.9		2.3		0.610169
	2018-02-27-p1-Right	9.1		4.7		0.483516
	2018-02-27-p1-Left	5.2		4.1		0.211538
	2018-05-02-p3-Right	1.2	1.1
	2018-05-02-p3-Left	1.2	0.3
	2018-05-07-p1-Right	1.8		1		0.444444
	2018-05-07-p1-Left	2.1	0.6
	2018-05-09-p1-Right	0.7	0.9
	2018-05-09-p1-Left	1.9	0.8
	2018-05-28-p1-Right	1.6	1
	2018-05-28-p1-Left	0.2	0.6
	2018-05-28-p2-Right	0.1	0.7
	2018-05-28-p2-Left	2.2		0.4		0.818182
	Mean	3.00107	0.893333	2.66923		0.50216
	Standard Deviation	2.45318	0.341147	1.82318		0.200056
	Count	28	15	13		13
	SEM	0.463607	0.0880837	0.505658		0.0554854
