# Supplementary material for: Feed-forward recruitment of electrical synapses enhances synchronous spiking in the mouse cerebellar cortex
Source: eLife. 2020 Sep 29;9:e57344. doi: 10.7554/eLife.57344 (PMC7524550; doi:10.7554/eLife.57344)
Supplement: Figure 6—source data 1. [file elife-57344-fig6-data1.xlsx]

## Sheet: Panel C
Figure 6: Electrical synapses are more frequent than chemical inhibitory synapses between BCs
Figure 6C
Group	Mean frequency (%)	SD	SEM	N
Electrical	58.3333	49.3007	6.36469	60
Chemical	41.1765	49.2153	5.33815	85
Statistical Test Performed
Test				P value
Unpaired t test				0.0408
