# Supplementary material for: Feed-forward recruitment of electrical synapses enhances synchronous spiking in the mouse cerebellar cortex
Source: eLife. 2020 Sep 29;9:e57344. doi: 10.7554/eLife.57344 (PMC7524550; doi:10.7554/eLife.57344)
Supplement: Figure 7—figure supplement 1—source data 1. [file elife-57344-fig7-figsupp1-data1.xlsx]

## Sheet: Panel A
Figure 7 - figure supplement 1 : Control experiments for spikelet effect on EPSPs.
	Figure 7 - figure supplement 1A
	1st EPSP peak amplitude (mV)
	no OC	OC
	10.5321	2.28488
	7.7565	5.78908
	5.54592	5.3375
	6.65176	3.32407
	3.05814	2.91143
	4.6874	7.71352
	2.66238	2.1414
	3.37566	4.19712
	1.61983	2.7701
	3.06687	5.47004
	2.45348	1.74186
	2.42238	5.79457
	2.01112	3.32877
	2.52332	2.8644
	3.23538	3.32952
	1.6428	9.01781
	7.20513	5.64838
	4.92026	2.70992
	2.57959	2.58256
	1.83936	12.1068
	2.71788	5.54806
	6.04657	9.39972
	3.42176
	1.04316
	6.51287
	2.30144
	5.63922
Summary Statistics
N stim. sites	27	22
N cells	16	17
Mean	3.98	4.819
SD	2.304	2.718
SEM	0.4434	0.5795
Lower 95% CI of mean	3.069	3.614
Upper 95% CI of mean	4.892	6.024
Statistical Test Performed
Test		P value
Two-tailed Mann Whitney test		0.234

## Sheet: Panel B
	Figure 7 - figure supplement 1B
	no OC		OC
	Distance from soma (µm)	EPSP Half-Width (ms)	Distance from soma (µm)	EPSP Half-Width (ms)
	89.75	6.64521	88	4.73156
	46.25	5.94547	59.71	7.00908
	62.69	10.7997	52.35	5.11319
	64.92	9.87313	34.06	6.68062
	95.48	15.0749	77.76	4.17541
	29.16	14.0728	115.95	6.11563
	123.95	11.7274	117.67	5.75788
	41.75	8.64013	65.29	5.98634
	55.65	4.83926	94.42	5.72452
	118.02	7.5421	104.74	5.27411
	91.25	7.40957	84.74	5.75763
	84.86	18.0588	30.46	5.88598
	51.11	18.8826	64.23	5.76822
	59.8	8.55605	51.1	6.03723
	95.69	7.80018	55.4	4.14897
	85.67	8.61363	59.2	4.50071
	88.14	9.02526	64.05	6.32755
	66.73	7.89675	71.1	6.95636
	122.1	7.49582	131.6	6.41268
	53.12	8.35242	44.92	7.56687
	82.41	8.70691	100.13	8.12189
	57.74	6.11397	48.96	5.34716
	39.9	10.0736
	55.1	10.0642
	82.5	13.9556
	61.25	14.6716
	Statistical Test Performed
	Linear least squares regression analysis
Equation	-0.01437*X + 11.01		0.001367*X + 5.781
	Is slope significantly non-zero? - F test
F	0,2634		0,02788
DFn, DFd	1, 25		1, 20
P value	0,6123		0,8691
	Do the Y intercepts differ? - F test
F	25.3306
DFn, DFd	1, 46
P value	< 0,0001
