# Supplementary material for: Feed-forward recruitment of electrical synapses enhances synchronous spiking in the mouse cerebellar cortex
Source: eLife. 2020 Sep 29;9:e57344. doi: 10.7554/eLife.57344 (PMC7524550; doi:10.7554/eLife.57344)
Supplement: Figure 7—source data 1. [file elife-57344-fig7-data1.xlsx]

## Sheet: Panel B
Figure 7: Feed-forward recruitment of spikelets narrows single EPSP width and dampens temporal summation
	Figure 7B
	EPSP half-width (ms) per group
	LS	HS
	15.4582	15.2454
	12.0538	12.5159
	14.163	12.7542
	18.0588	16.3982
	18.8826	16.4896
	8.55605	9.68321
	12.8162	12.5145
	18.8633	18.6756
	9.57005	8.39865
	9.91451	8.78881
	5.09574	6.16543
	8.83411	8.25776
	7.84146	7.91835
	7.56302	7.73683
	6.33609	6.86384
	Summary Statistics per group
	LS	HS
N stim. sites	15
N cells	12
Avg	11.6	11.23
SD	4.59	4.006
SEM	1.185	1.034
Lower 95% CI of mean	9.059	9.009
Upper 95% CI of mean	14.14	13.45
Statistical Test Performed
Test		P value
Wilcoxon matched-pairs signed rank test		0.1876

## Sheet: Panel D
	Figure 7D
	EPSP half-width (ms) per group
	LS	HS
	10.3688	7.40972
	7.82858	5.34101
	5.50366	4.25758
	7.40957	5.14274
	12.7897	8.53708
	7.69101	7.61524
	11.7281	10.5148
	7.19871	5.78194
	7.73417	6.85854
N	9
Statistical Test Performed
Test		P value
Wilcoxon matched-pairs signed rank test		0.0039

## Sheet: Panel F
	Figure 7F
	EPSPn/EPSP1 per group
	EPSP only				EPSP + spikelet				Column factor
	Pulse number				Pulse number				Row factor
	2nd	3rd	4th	5th	2nd	3rd	4th	5th
	1.10833	1.29915	1.42898	1.1186	0.965635	1.14364	1.12871	1.04957
	1.11528	1.25163	1.263	1.20569	1.31725	1.46623	1.4663	1.3879
	1.56661	1.56661	1.70029	1.78353	1.47114	1.7994	1.88812	1.82525
	1.26416	1.36635	1.35671	1.3554	1.51642	2.16239	2.19833	2.69473
	1.47518	2.00935	2.29828	2.64213	1.44487	1.84726	1.8834	2.02177
	1.95929	2.87002	3.41332	3.57147	1.29927	1.28302	1.39434	1.39445
	1.72441	2.35216	2.48088	2.90626	1.30148	1.82526	1.90687	1.91028
	2.21567	2.85181	3.42752	3.43623	1.63202	1.87252	1.88659	1.6345
	2.28676	2.27379	2.315	2.74776	1.17864	1.40711	1.37121	1.3846
	1.65274	1.59792	1.54279	1.68283	2.28676	2.27379	2.315	2.74776
	1.62845	1.99703	2.05172	1.89386	1.34041	1.92152	1.59806	1.96159
	1.43697	1.7358	1.70954	1.8041	1.48026	1.83486	1.87894	1.92431
	1.72656	1.90084	2.13089	2.24757	1.61415	1.91114	2.18766	2.25088
	1.53206	1.98009	2.11248	2.39925	1.38593	1.40743	1.46249	1.53574
	1.86888	2.15184	2.45041	2.48445	1.36203	1.38189	1.17731	1.20331
	1.22087	1.52219	1.71938	1.94037	1.65087	1.80352	1.85085	1.67885
	1.88902	2.28826	2.34661	2.36333	1.17824	1.27077	1.26128	1.30564
	1.36707	1.47895	1.49668	1.51153	1.50409	1.81015	1.93179	1.98519
	2.23996	3.06719	3.26748	3.28605	1.10211	1.38933	1.40057	1.55052
	1.80887	2.38194	2.30822	2.31183	1.11472	1.24983	1.42689	1.77888
	1.67239	1.91319	1.97209	1.99965	1.49443	1.73778	1.80102	1.83535
	1.58917	1.90845	2.26942	2.13709	1.56131	1.87442	1.85457	1.86664
	1.43519	1.88684	1.84028	2.21054
	1.30707	1.71016	2.13371	2.42062
	1.54424	2.05189	2.2214	2.38815
	2.07358	2.47195	2.67999	2.95557
	1.53321	1.75954	1.91103	2.01517
	Summary Statistics per group
	EPSP only				EPSP + spikelet
	Pulse number				Pulse number
	2nd	3rd	4th	5th	2nd	3rd	4th	5th
N stim. Sites	27				22
N cells	16				17
Avg	1.639	1.987	2.143	2.253	1.418	1.667	1.694	1.769
SD	0.3264	0.4742	0.575	0.6357	0.2676	0.3129	0.3403	0.4293
SEM	0.06281	0.09126	0.1107	0.1223	0.05704	0.06672	0.07256	0.09152
Lower 95% CI of mean	1.509	1.799	1.915	2.001	1.3	1.528	1.543	1.579
Upper 95% CI of mean	1.768	2.174	2.37	2.504	1.537	1.806	1.845	1.96
Statistical Test Performed
Two-way repeated measures ANOVA
ANOVA table			SS	DF	MS	F (DFn, DFd)		P value
interaction factor			0.5315	3	0.1772	F (3, 141) = 5,462		P=0,0014
row factor			6.362	3	2.121	F (3, 141) = 65,38		P<0,0001
column factor			6.564	1	6.564	F (1, 47) = 9,347		P=0,0037
Subject			33.01	47	0.7023	F (47, 141) = 21,65		P<0,0001
Residual			4.574	141	0.03244
