# Supplementary material for: Feed-forward recruitment of electrical synapses enhances synchronous spiking in the mouse cerebellar cortex
Source: eLife. 2020 Sep 29;9:e57344. doi: 10.7554/eLife.57344 (PMC7524550; doi:10.7554/eLife.57344)
Supplement: Figure 8—source data 1. [file elife-57344-fig8-data1.xlsx]

## Sheet: Panel E
Figure 8: Spikelet signaling enables temporal contrast enhancement of basket cell excitation.
Figure 8E
time delay (ms)	Compound synaptic response peak amplitude (%)
	Mean	SD	SEM	N
-100	99.2301	4.6223	1.33434	12
-75	96.9588	8.0503	2.32392	12
-50	102.438	6.6037	1.90632	12
-40	102.474	5.6179	1.62175	12
-30	98.0401	5.5432	1.60018	12
-20	100.859	7.7028	2.22361	12
-10	101.245	10.8158	3.12225	12
-5	104.989	12.015	3.46843	12
-2	121.509	14.0041	4.04264	12
-1	122.512	15.2508	4.40253	12
0	121.253	8.2785	2.3898	12
1	119.843	15.9161	4.59458	12
2	120.906	12.8418	3.70711	12
5	98.0295	11.23	3.24182	12
10	92.8204	12.5324	3.61779	12
20	79.9449	9.964	2.87636	12
30	84.2964	13.0633	3.77105	12
40	86.1532	12.2397	3.5333	12
50	86.1512	13.0777	3.77521	12
75	92.624	12.9939	3.75102	12
100	100.185	12.1614	3.51069	12

## Sheet: Panel G
Figure 8G
time delay (ms)	Spike probability (%)
	Mean	SD	SEM	N
-100	93.5201	20.7515	6.25681	11
-75	96.3607	22.2595	6.71149	11
-50	100.941	15.6914	4.73114	11
-40	92.633	18.3164	5.5226	11
-30	105.442	13.4974	4.06962	11
-20	111.102	9.7086	2.92725	11
-10	101.794	23.7858	7.17169	11
-5	117.705	22.2557	6.71035	11
-2	154.772	29.9079	9.01757	11
-1	142.362	25.3345	7.63864	11
0	149.278	26.5155	7.99472	11
1	142.815	34.8038	10.4937	11
2	121.607	47.9773	14.4657	11
5	95.5885	55.3186	16.6792	11
10	54.8472	37.4823	11.3013	11
20	59.5437	20.1868	6.08655	11
30	68.4951	27.5175	8.29684	11
40	77.7948	19.1988	5.78866	11
50	85.9783	27.3761	8.2542	11
75	93.522	18.9316	5.70809	11
100	86.9235	25.4616	7.67696	11
